# Supplementary material
Source: publisher site journal article supplement (https://arthropod-systematics.arphahub.com/article/67569/download/suppl/33/)
Supplement: Supplementary file 1

## Supplement 3

**Figure S2:** Terminologies and abbreviations used for female genitalia

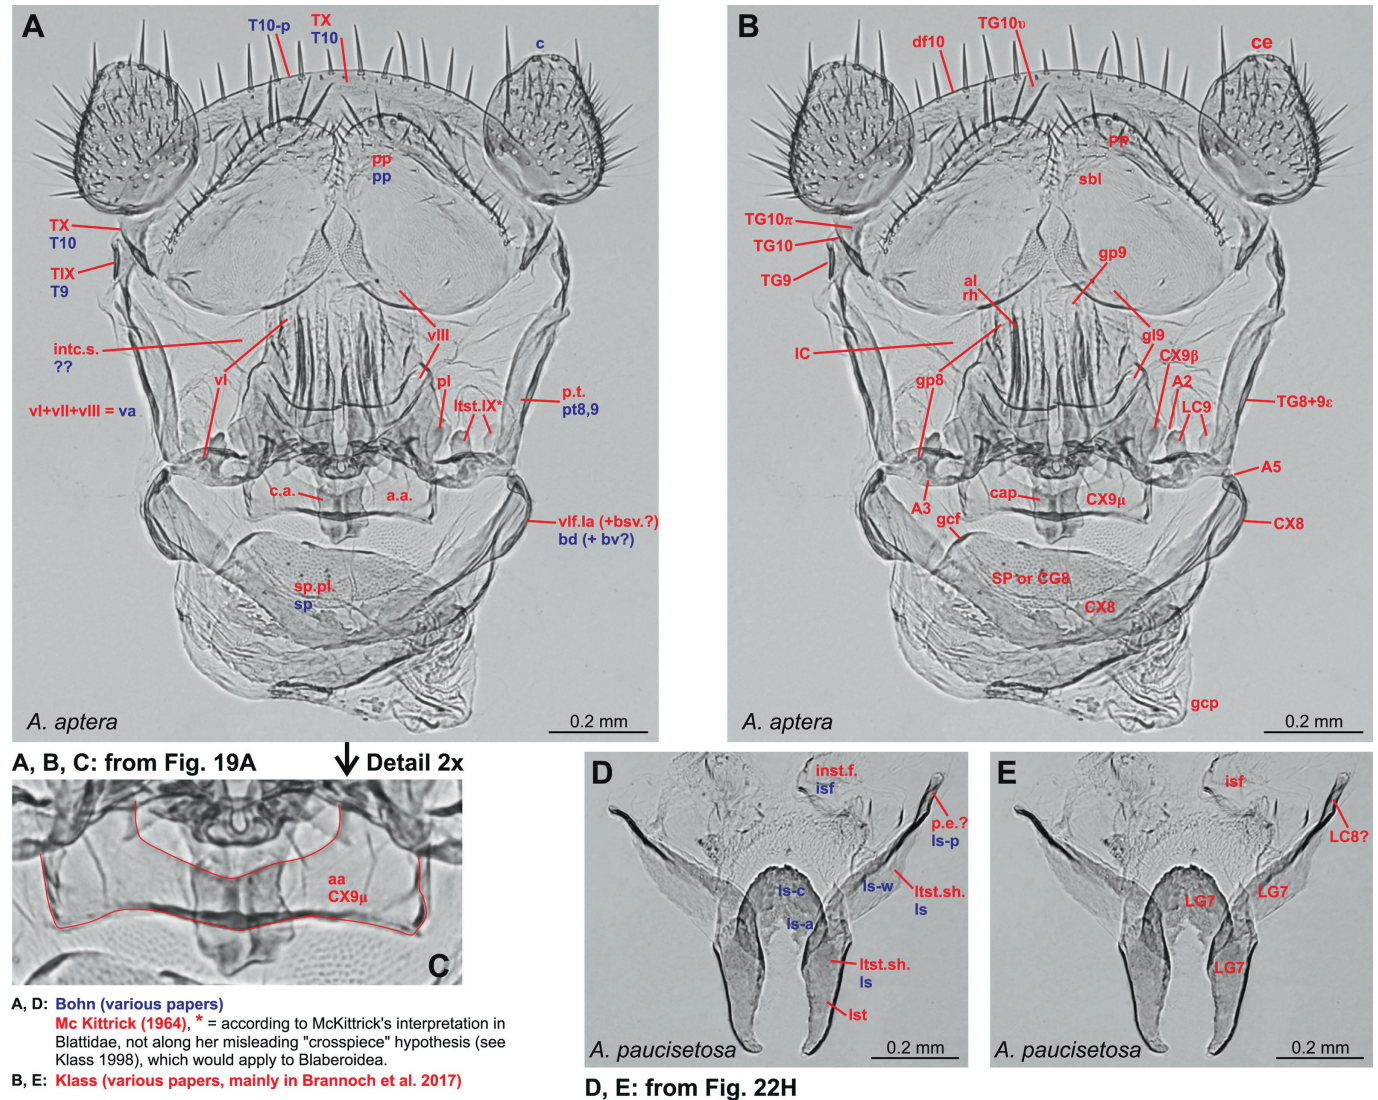

**Figure S2.** Terminologies and abbreviations used for female genitalia, exemplified by *Attaphila aptera* (Bo 1253) (**A–C**, identical with Fig. 19A) and *Attaphila paucisetosa* (PT, Bo 1255) (**D, E**, identical with Fig. 22H). **A, D:** Terminologies of Bohn (various papers; in blue) and McKittrick (1964; in red); \* = according to McKittrick's interpretation in Blattidae, not along her misleading "crosspiece" hypothesis (see Klass 1998), which would apply to Blaberoidea. **B, E:** Terminology of Klass (various papers, mainly in Brannoch et al. 2017, with some new terms added that are designed according to the principles explained therein; in red). **C:** 2× enlargement of anterior arch area, taken from A, anterior arch outlined in red, with terms of McKittrick (1964; aa) and Brannoch et al. (2017: CX9μ). — **Abbreviations:** See original papers for full meanings (partly given in Supplement 1), which are not relevant here.
